# Supplementary material for: A portable electrochemical immunosensor for rapid detection of trace aflatoxin B1 in rice
Source: Royal Society of Chemistry journal article supplement (doi:10.1039/c5ay02643a), 2015-12-08
Supplement: c5ay02643a1.pdf [file c5ay02643a1.pdf]

Table S1: Comparison of electrochemical immunosensor for detection of mycotoxins.

| Bio-electrode                       | Targets          | Detection limit          | Amplification | Complexity | Samples        |
|-------------------------------------|------------------|--------------------------|---------------|------------|----------------|
| RGO/ITO <sup>1</sup>                | AFB <sub>1</sub> | 0.25 ng mL <sup>-1</sup> | Needed        | Medium     | Spiked samples |
| MWCNTs/RTIL/GCE <sup>2</sup>        | AFB <sub>1</sub> | 0.03 ng mL <sup>-1</sup> | Needed        | Medium     | Olive oil      |
| SWCNTs/Chitosan/GCE <sup>3</sup>    | AFB <sub>1</sub> | 3.5 pg mL <sup>-1</sup>  | Needed        | Medium     | Corn           |
| PoPD/Nanoelectrode <sup>4</sup>     | AFB <sub>1</sub> | 0.02 ng mL <sup>-1</sup> | Needed        | Hard       | Spiked samples |
| PB/SPE <sup>5</sup>                 | AFB <sub>1</sub> | 2 ng mL <sup>-1</sup>    | Needed        | Medium     | Olive oil      |
| MNPs/GNPs/Chitosan/GCE <sup>6</sup> | AFB <sub>1</sub> | 0.2 ng mL <sup>-1</sup>  | Needed        | Hard       | Spiked samples |
| MNPs/SPE <sup>7</sup>               | OTA              | 5 ng mL <sup>-1</sup>    | Not needed    | Medium     | Red wine       |
| HRP/SPE <sup>8</sup>                | Fms              | 5 ng mL <sup>-1</sup>    | Needed        | Medium     | Corn           |
| GNPs/SPE <sup>9</sup>               | AFM <sub>1</sub> | 15 ng mL <sup>-1</sup>   | Needed        | Medium     | Milk           |
| HRP/GME <sup>10</sup>               | AFM <sub>1</sub> | 8 ng mL <sup>-1</sup>    | Needed        | Medium     | Milk           |
| SPIM*                               | AFB <sub>1</sub> | 5 ng mL <sup>-1</sup>    | Not needed    | Easy       | Rice           |

\* our present work.

(SWCNTs-single-walled carbon nanotubes; GCE-glassy carbon electrode; MWCNTs-multi-walled carbon nanotubes; RTIL-room temperature ionic liquids; PoPD-poly (o-phenylenediamine); PB-prussian blue; MNPs-magnetic nanoparticles; GNPs-Au nanoparticles; PANi-polyaniline; IDE-interdigitated electrode; RGO-reduced graphene oxide; ITO-indium tin oxide; HRP-horse reddish peroxidase; GME-gold microelectrode; Fms- fumonisins)

## References

1. S. Srivastava, V. Kumar, M. A. Ali, P. R. Solanki, A. Srivastava, G. Sumana, P. S. Saxena, A. G. Joshi and B. Malhotra, *Nanoscale*, 2013, 5, 3043.
2. L. Yu, Y. Zhang, C. Hu, H. Wu, Y. Yang, C. Huang and N. Jia, *Food Chem.*, 2015, 176, 22.
3. X. Zhang, C. Li, W. Wang, J. Xue, Y. Huang, X. Yang, B. Tan, X. Zhou, C. Shao and S. Ding, *Food Chem.*, 2016, 192, 197.
4. H. Hu, L. Cao, Q. Li, K. Ma, P. Yan and D. W. Kirk, *RSC Adv.*, 2015, 5, 55209.
5. I. B. Rejeb, F. Arduini, A. Arvinte, A. Amine, M. Gargouri, L. Micheli, C. Bala, D. Moscone and G. Palleschi, *Biosens. Bioelectron.*, 2009, 24, 1962.
6. L. Masoomi, O. Sadeghi, M. H. Banitaba, A. Shahrjerdi and S. S. H. Davarani, *Sensor Actuat B-Chem.*, 2013, 177, 1122.
7. J. C. Vidal, L. Bonel, A. Ezquerra, P. Duato and J. R. Castillo, *Anal. Bioanal. Chem.*, 2012, 403, 1585.
8. M. K. Abdul Kadir and I. E. Tothill, *Toxins*, 2010, 2, 382.
9. A. Vig, A. Radoi, X. Muñoz-Berbel, G. Gyemant and J. Marty, *Sensor Actuat B-Chem.*, 2009, 138, 214.
10. C. O. Parker, Y. H. Lanyon, M. Manning, D. W. Arrigan and I. E. Tothill, *Anal. Chem.*, 2009, 81, 5291.
